# Supplementary material
Source: Royal Society of Chemistry journal article supplement (doi:10.1039/d6ew00070c)
Supplement: d6ew00070c1.pdf [file d6ew00070c1.pdf]

1

## Supplementary material

2 **Enhancing protein pre-hydrolysis via effluent recirculation towards high-rate**

3 **household food waste anaerobic digestion using expanded granular sludge bed**

4 **reactor**

5 Yonghong Wang<sup>a</sup>, Min Ye<sup>a</sup>, Zhuoying Qi<sup>a</sup>, Lianpei Zou<sup>a</sup>, Yu-You Li<sup>b</sup>, Jianyong Liu<sup>a,\*</sup>

6 *<sup>a</sup> School of Environmental and Chemical Engineering, Shanghai University, 333*

7 *Nanchen Road, Shanghai 200444, China*

8 *<sup>b</sup> Department of Civil and Environmental Engineering, Graduate School of Engineering,*

9 *Tohoku University, 6-6-06 Aza, Aramaki, Aoba-ku, Sendai, Miyagi 980-8579, Japan*

10

11 \* Corresponding author:

12 1. Tel: +86 21 66137769, E-mail: liujianyong@shu.edu.cn, (Jianyong Liu)

13 Table S1 The composition of household food waste.

14 Table S2 Physicochemical properties of household food waste.

15 Table S3 Experimental design and operating conditions of treating household food  
16 waste using EGSB.

17 Table S4 Alpha diversity index statistics of bacteria.

18 Table S5 Alpha diversity index statistics of archaea.

19 Table S6 Classification of typical methanogens and metabolic substrates in EGSB  
20 reactor.

21 Table S7 Characteristics of effluent from EGSB reactor.

22 Table S8 Alpha diversity index statistics of bacteria.

23 Fig. S1. Changes in  $\text{NH}_4^+\text{-N}$  concentration (mg/L) in the expanded granular sludge bed  
24 reactor during the treatment of household food waste. The operation was divided into six  
25 phases (Phase I to VI) corresponding to organic loading rates ranging from 2.0 to 9.0 g  
26 COD/L/d, respectively.

27 Fig. S2. Bacterial community composition at the phylum level in the expanded granular  
28 sludge bed reactor under different organic loading rates (seed sludge, OLR = 4.0 g  
29 COD/L/d, and OLR = 9.0 g COD/L/d).

30 Fig. S3. Archaeal community composition at the genus level in the expanded granular  
31 sludge bed reactor under different organic loading rates (seed sludge, OLR = 4.0 g  
32 COD/L/d, and OLR = 9.0 g COD/L/d).

33 Fig. S4. Changes in (a)  $\text{NH}_4^+\text{-N}$  concentration (mg/L), (b) alkalinity (mg  $\text{CaCO}_3\text{/L}$ ), and  
34 (c) free ammonia (FA) (mg/L) in the pre-hydrolysis reactors with and without expanded  
35 granular sludge bed effluent recirculation over the operational period.

36 **Table S1 The composition of household food waste.**

| <b>Category</b>         | <b>Material</b> | <b>Proportion (%)</b> | <b>Source / Brand</b>          |
|-------------------------|-----------------|-----------------------|--------------------------------|
| Food                    | Rice            | 10                    | School canteen                 |
|                         | Noodles         | 4                     | School canteen                 |
|                         | Steamed bun     | 4                     | School canteen                 |
|                         | Bread           | 4                     | Taoli Chunjiao Sliced Bread    |
| Vegetables              | Cabbage         | 8                     | Cabbage head                   |
|                         | Potato          | 8                     | Potato                         |
|                         | Carrot          | 8                     | Carrot                         |
|                         | Bok choy        | 8                     | Shanghai qing                  |
| Fruits                  | Banana          | 8                     | Tete Banana                    |
|                         | Apple           | 8                     | Red Fuji apple                 |
|                         | Pomelo          | 4                     | Yellow-hearted honey<br>pomelo |
|                         | Orange          | 4                     | Dekopon                        |
| Meat, fish, eggs & tofu | Chicken         | 5                     | Fresh chicken breast           |
|                         | Pork            | 5                     | Lean pork                      |
|                         | Fish fillet     | 4                     | Basa fillet                    |
|                         | Tofu            | 4                     | Soft tofu                      |
|                         | Eggshell        | 4                     | Yonghui Farm fresh eggs        |

37

38 **Table S2 Physicochemical properties of household food waste.**

| Parameters                      | Units | HFW          |
|---------------------------------|-------|--------------|
| TS                              | g/L   | 193.4 ± 0.2  |
| VS                              | g/L   | 10.7 ± 0.1   |
| VS/TS                           | -     | 0.9          |
| Moisture content                | %     | 81.0         |
| TSS                             | g/L   | 110.2 ± 3.0  |
| VSS                             | g/L   | 109.0 ± 2.6  |
| TCOD                            | g/L   | 162.9 ± 12.7 |
| SCOD                            | g/L   | 64.8 ± 14.4  |
| pH                              | -     | 4.7          |
| NH <sub>4</sub> <sup>+</sup> -N | mg/L  | 11.5 ± 0.1   |
| Total Carbohydrate              | g/L   | 69.0         |
| Total Carbohydrate              | %TS   | 35.7         |
| Soluble carbohydrate            | g/L   | 46.7 ± 5.2   |
| Total protein                   | g/L   | 38.7         |
| Total protein                   | %TS   | 20.0         |
| Soluble protein                 | g/L   | 26.3 ± 0.4   |
| Lipids                          | %     | 12.0         |
| Lipids                          | g/L   | 23.2         |
| Crude fibers                    | g/L   | 27.4         |
| Crude fibers                    | %TS   | 14.1         |

39 TS: Total solids; VS: Volatile solids; TSS: Total suspended solids; VSS: Volatile suspended solids;

40 TCOD: Total chemical oxygen demand; SCOD: Soluble chemical oxygen demand.

41 **Table S3 Experimental design and operating conditions of treating household food**  
42 **waste using EGSB.**

| Phase | Day     | HRT (d) | OLR (g COD/L/d) | T (°C) |
|-------|---------|---------|-----------------|--------|
| 1     | 1–26    | 9       | 2               | 35     |
| 2     | 27–71   | 9       | 3               | 35     |
| 3     | 72–100  | 9       | 4               | 35     |
| 4     | 101–117 | 9       | 5               | 35     |
| 5     | 118–131 | 9       | 7               | 35     |
| 6     | 132–164 | 9       | 9               | 35     |

43 OLR: Organic loading rate; T: Temperature; HRT: Hydraulic retention time.

44 **Table S4 Alpha diversity index statistics of bacteria.**

|                 | Chao    | Ace     | Simpson | Shannon | Coverage |
|-----------------|---------|---------|---------|---------|----------|
| Seed sludge     | 535.600 | 538.5   | 0.088   | 3.703   | 0.999    |
| OLR: 4 gCOD/L/d | 296.395 | 298.087 | 0.032   | 4.108   | 1.000    |
| OLR: 9 gCOD/L/d | 235.000 | 235.000 | 0.056   | 3.663   | 1.000    |

45 OLR: Organic loading rate.

46 **Table S5 Alpha diversity index statistics of archaea.**

|                 | Chao   | Ace    | Simpson | Shannon | Coverage |
|-----------------|--------|--------|---------|---------|----------|
| Seed sludge     | 69.2   | 69.4   | 0.306   | 1.939   | 0.999    |
| OLR: 4 gCOD/L/d | 50.000 | 50.000 | 0.230   | 1.723   | 1.000    |
| OLR: 9 gCOD/L/d | 46.000 | 46.000 | 0.321   | 1.480   | 1.000    |

47 OLR: Organic loading rate.

48 **Table S6 Classification of typical methanogens and metabolic substrates in EGSB**  
 49 **reactor.**

| Archaea                              | Metabolic substrates                                                                        |
|--------------------------------------|---------------------------------------------------------------------------------------------|
| <i>Methanosaeta</i>                  | Acetic acid                                                                                 |
| <i>Methanosarcina</i>                | H <sub>2</sub> /CO <sub>2</sub> , Acetic acid                                               |
| <i>Methanobacterium</i>              | H <sub>2</sub> /CO <sub>2</sub> , Formic acid, 2-Propano, 2-Butanol                         |
| <i>Candidatus_Methanofastidiosum</i> | H <sub>2</sub> /CO <sub>2</sub>                                                             |
| <i>Methanospirillum</i>              | H <sub>2</sub> /CO <sub>2</sub> , Formic acid                                               |
| <i>Methanocorpusculum</i>            | H <sub>2</sub> /CO <sub>2</sub> , Formic acid                                               |
| <i>Methanomassiiicoccus</i>          | H <sub>2</sub> /CO <sub>2</sub> , Formic acid                                               |
| <i>Methanomethylovorans</i>          | Trimethylamine, Dimethylamine, Methylamine,<br>Methanol, Dimethyl sulfide, Methyl mercaptan |
| <i>Methanoculleus</i>                | H <sub>2</sub> /CO <sub>2</sub> , Formic acid                                               |

50

51 **Table S7 Characteristics of effluent from EGSB reactor.**

| Indicators                      | units                   | value             |
|---------------------------------|-------------------------|-------------------|
| pH                              |                         | $7.2 \pm 0.1$     |
| TCOD                            | g/L                     | $0.9 \pm 0.2$     |
| SCOD                            | g/L                     | $0.2 \pm 0.1$     |
| Proteins                        | g/L                     | $0.3 \pm 0.1$     |
| Carbohydrates                   | g/L                     | 0.1               |
| NH <sub>4</sub> <sup>+</sup> -N | mg/L                    | $132.2 \pm 4.9$   |
| Alkalinity                      | mg CaCO <sub>3</sub> /L | $953.1 \pm 110.5$ |
| TSS                             | g/L                     | 0.1               |
| VSS                             | g/L                     | 0.1               |

52

53 **Table S8 Alpha diversity index statistics of bacteria.**

|                  | Chao    | Ace     | Simpson | Shannon | Coverage |
|------------------|---------|---------|---------|---------|----------|
| Seed sludge      | 286.941 | 289.585 | 0.059   | 3.585   | 1.000    |
| No-recirculation | 195.556 | 197.139 | 0.202   | 2.500   | 1.000    |
| Recirculation    | 240.000 | 240.000 | 0.112   | 3.165   | 1.000    |

54

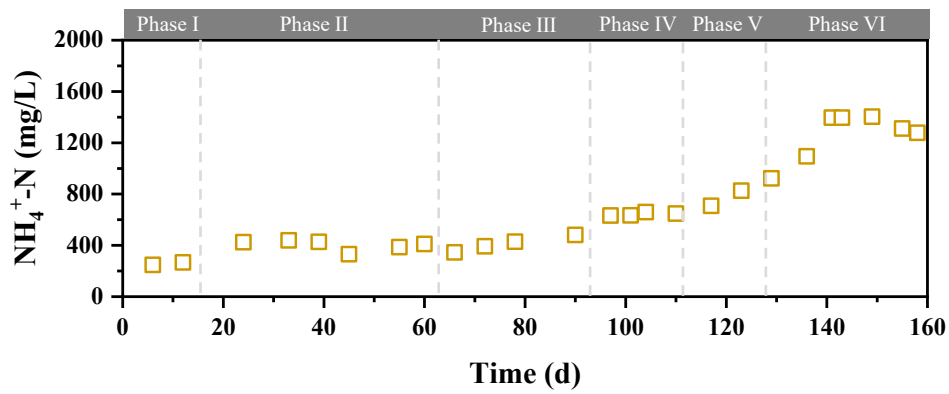

55

56 **Fig. S1. Changes in NH<sub>4</sub><sup>+</sup>-N concentration (mg/L) in the expanded granular sludge**  
 57 **bed reactor during the treatment of household food waste. The operation was**  
 58 **divided into six phases (Phase I to VI) corresponding to organic loading rates**  
 59 **ranging from 2.0 to 9.0 g COD/L/d, respectively.**

60

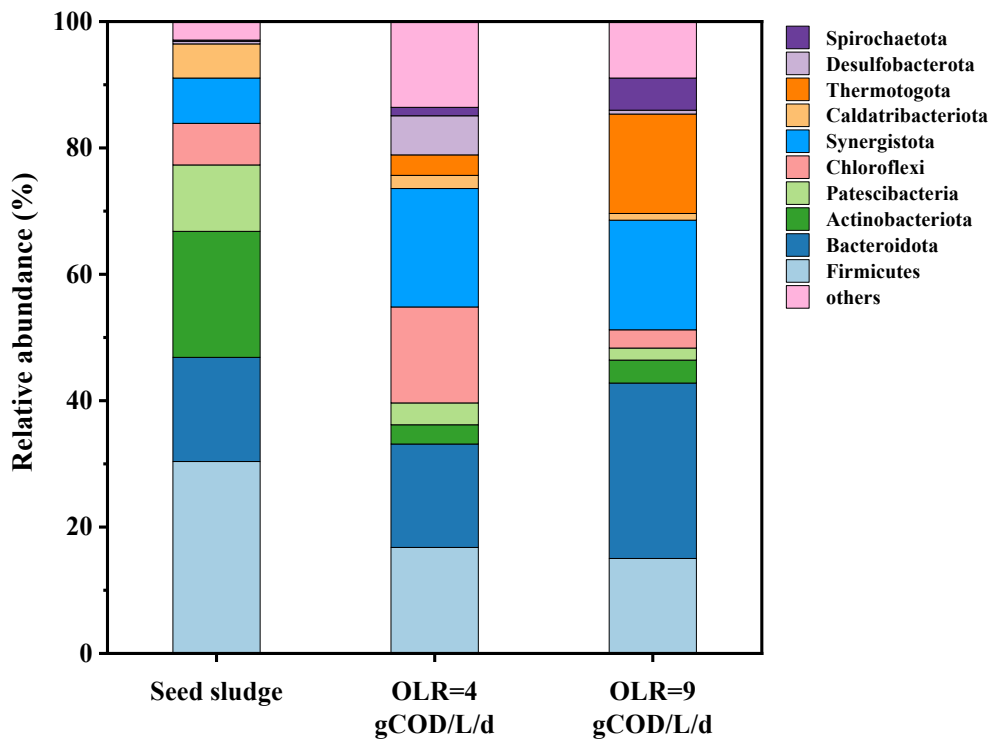

61

62 **Fig. S2. Bacterial community composition at the phylum level in the expanded**  
 63 **granular sludge bed reactor under different organic loading rates (seed sludge, OLR**  
 64 **= 4.0 g COD/L/d, and OLR = 9.0 g COD/L/d).**

65

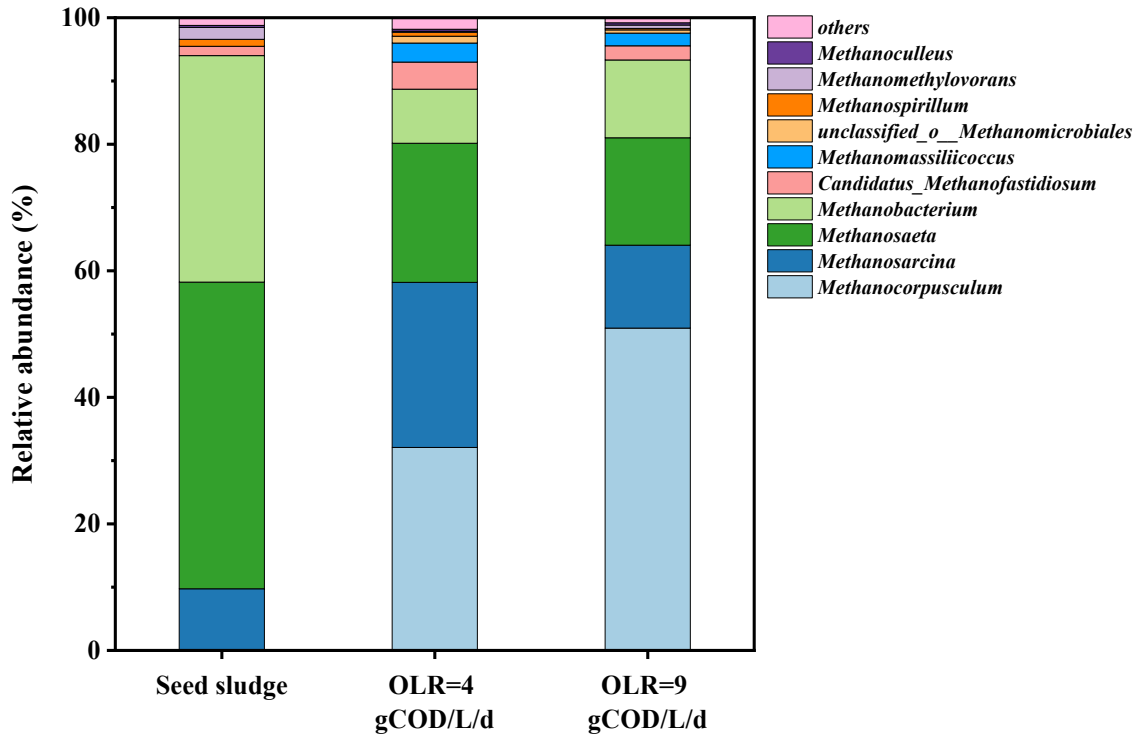

66

67 **Fig. S3. Archaeal community composition at the genus level in the expanded**  
 68 **granular sludge bed reactor under different organic loading rates (seed sludge, OLR**  
 69 **= 4.0 g COD/L/d, and OLR = 9.0 g COD/L/d).**

70

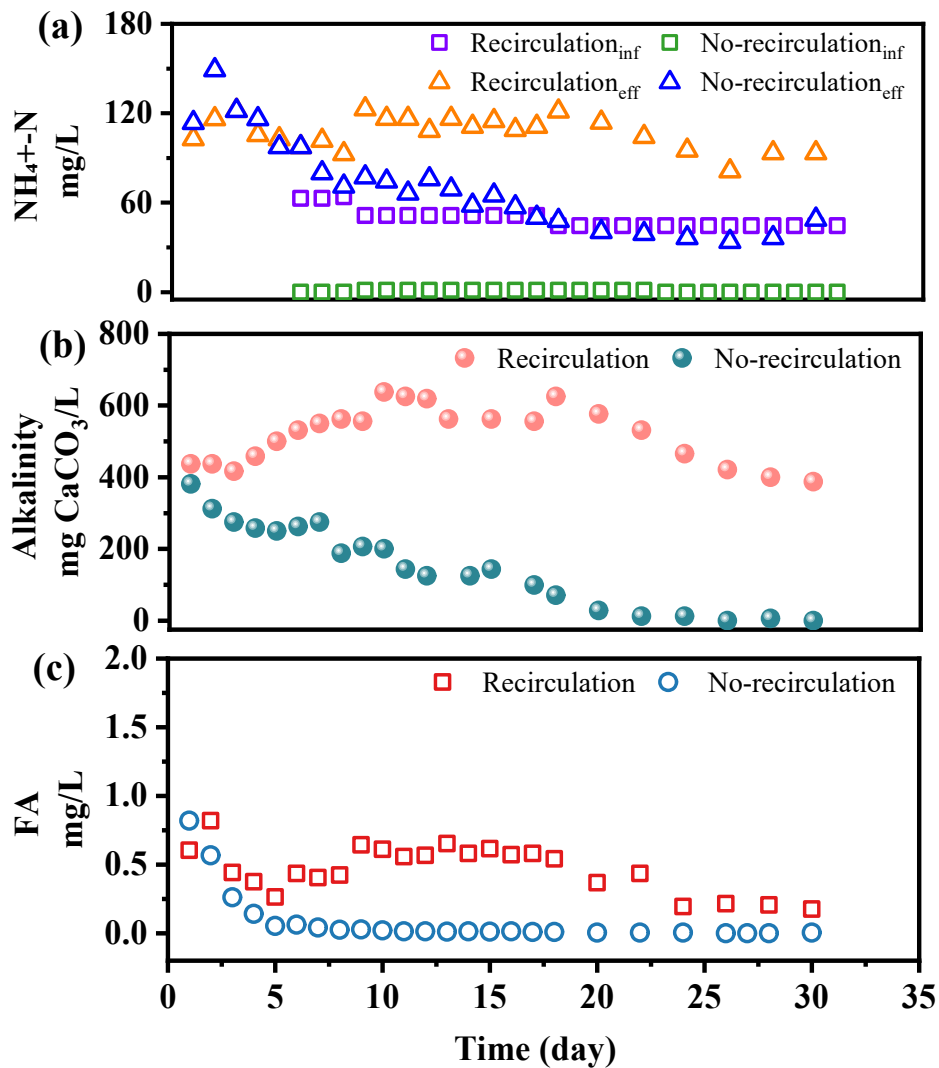

71

72 **Fig. S4. Changes in (a)  $\text{NH}_4^+\text{-N}$  concentration (mg/L), (b) alkalinity (mg  $\text{CaCO}_3/\text{L}$ ),**  
 73 **and (c) free ammonia (FA) (mg/L) in the pre-hydrolysis reactors with and without**  
 74 **expanded granular sludge bed effluent recirculation over the operational period.**
